# Supplementary material for: Potential Effects of Poloxamer 188 on Rat Isolated Brain Mitochondria after Oxidative Stress In Vivo and In Vitro
Source: MDPI journal article supplement (doi:10.3390/brainsci11010122), 2021-01-18
Supplement: s1 [file s1]

## Supplementary Materials

**Table S1.** Chemical Substances, Reagents, Solutions, Kits.

| Name                                                                                        | Company                    | Catalog No.  |
|---------------------------------------------------------------------------------------------|----------------------------|--------------|
| KetaVed® Ketamine Hydrochloride Injection, USP                                              | Vedco Inc.                 | 50989-996-06 |
| Heparin Sodium Injection, USP                                                               | West-Ward Pharmaceuticals  | 0641-2450-55 |
| D-Mannitol                                                                                  | Sigma-Aldrich              | M4125        |
| Sucrose                                                                                     | Sigma-Aldrich              | S7903        |
| Potassium phosphate monobasic (KH <sub>2</sub> PO <sub>4</sub> )                            | Sigma-Aldrich              | P5379        |
| MOPS                                                                                        | Sigma-Aldrich              | M3183        |
| Bovine Serum Albumin (BSA)                                                                  | Fisher Scientific          | BP1600       |
| Ethylene glycol-bis(2-aminoethylether)-N,N,N',N'-tetraacetic acid (EGTA)                    | Sigma-Aldrich              | E4378        |
| Potassium hydroxide (KOH)                                                                   | Sigma-Aldrich              | P1767        |
| Percoll®                                                                                    | Cytiva                     | 17-0891-01   |
| Potassium chloride (KCl)                                                                    | Sigma-Aldrich              | P4504        |
| Potassium phosphate dibasic trihydrate (K <sub>2</sub> HPO <sub>4</sub> •3H <sub>2</sub> O) | Sigma-Aldrich              | P5504        |
| Bio-Rad Protein Assay Dye Reagent Concentrate                                               | Bio-Rad Laboratories, Inc. | 5000006      |
| Hydrogen peroxide (H <sub>2</sub> O <sub>2</sub> ) solution                                 | Sigma-Aldrich              | 216763       |
| Kolliphor® P 188                                                                            | Sigma-Aldrich              | 15759        |
| L-Glutamic acid monosodium salt hydrate                                                     | Sigma-Aldrich              | G1626        |
| L-(-)-Malic acid disodium salt                                                              | Sigma-Aldrich              | M9138        |
| Sodium succinate dibasic hexahydrate                                                        | Sigma-Aldrich              | S2378        |
| Rotenone                                                                                    | Sigma-Aldrich              | R8875        |
| Dimethyl sulfoxide (DMSO)                                                                   | Sigma-Aldrich              | D5879        |
| P <sup>1</sup> ,P <sup>5</sup> -Di(adenosine-5') pentaphosphate pentasodium salt (DAP)      | Sigma-Aldrich              | D4022        |
| Adenosine 5'-diphosphate monopotassium salt dihydrate (ADP)                                 | Sigma-Aldrich              | A5285        |
| Adenosine 5'-triphosphate (ATP)                                                             | Thermo Fisher              | A22066       |
| D-Luciferin sodium salt                                                                     | Tocris                     | 5427         |
| Luciferase                                                                                  | G-Biosciences              | 786-1309     |
| Calcium chloride dihydrate                                                                  | Sigma-Aldrich              | C3881        |
| Calcium Green <sup>TM</sup> -5N, Hexapotassium Salt, cell impermeant                        | Thermo Fisher              | C3737        |

**Table S2.** Chemical Ingredients for Isolation Buffer (IB).

| Concentration | Chemical                        | Amount per liter       |
|---------------|---------------------------------|------------------------|
| 200 mM        | Mannitol                        | 36.4 g l <sup>-1</sup> |
| 50 mM         | Sucrose                         | 17.1 g l <sup>-1</sup> |
| 5 mM          | KH <sub>2</sub> PO <sub>4</sub> | 0.68 g l <sup>-1</sup> |
| 5 mM          | MOPS                            | 1.05 g l <sup>-1</sup> |
| 0.1%          | BSA                             | 1 g l <sup>-1</sup>    |
| 1 mM          | EGTA                            | 0.38 g l <sup>-1</sup> |

**Table S3.** Chemical Ingredients for Experimental Buffer (EB).

| Concentration | Chemical                                                        | Amount per liter       |
|---------------|-----------------------------------------------------------------|------------------------|
| 130 mM        | KCl                                                             | 9.7 g l <sup>-1</sup>  |
| 5 mM          | K <sub>2</sub> HPO <sub>4</sub> •3H <sub>2</sub> O <sup>1</sup> | 1.14 g l <sup>-1</sup> |
| 20 mM         | MOPS                                                            | 4.18 g l <sup>-1</sup> |
| 0.1%          | BSA                                                             | 1 g l <sup>-1</sup>    |

<sup>1</sup> For no-phosphate experimental buffer K<sub>2</sub>HPO<sub>4</sub>•3H<sub>2</sub>O was excluded.

|   | 1 | 2 | 3 | 4    | 5    | 6    | 7 | 8 | 9 | 10 | 11 | 12 |
|---|---|---|---|------|------|------|---|---|---|----|----|----|
| A |   |   |   | 0    | 0    | 0    |   |   |   |    |    |    |
| B |   |   |   | 0.1  | 0.1  | 0.1  |   |   |   |    |    |    |
| C |   |   |   | 0.25 | 0.25 | 0.25 |   |   |   |    |    |    |
| D |   |   |   | 0.5  | 0.5  | 0.5  |   | M | M |    |    |    |
| E |   |   |   | 1    | 1    | 1    |   |   |   |    |    |    |
| F |   |   |   | 2.5  | 2.5  | 2.5  |   |   |   |    |    |    |
| G |   |   |   | 5    | 5    | 5    |   |   |   |    |    |    |
| H |   |   |   | 10   | 10   | 10   |   |   |   |    |    |    |

**Figure S1.** Plating Template for Bio-Rad Protein Assay. The mitochondrial protein concentration was determined by plotting mitochondrial samples (M) against bovine serum albumin (BSA) sample standards of the shown concentrations (in  $\text{mg ml}^{-1}$ ).

**Table S4.** Chemical Ingredients for ATP Assay Buffer.

| Concentration              | Chemical   |
|----------------------------|------------|
| 0.2 $\mu\text{M}$          | DAP        |
| 30 $\mu\text{M}$           | ADP        |
| 0.1 $\text{mg ml}^{-1}$    | luciferin  |
| 1.25 $\mu\text{g ml}^{-1}$ | luciferase |

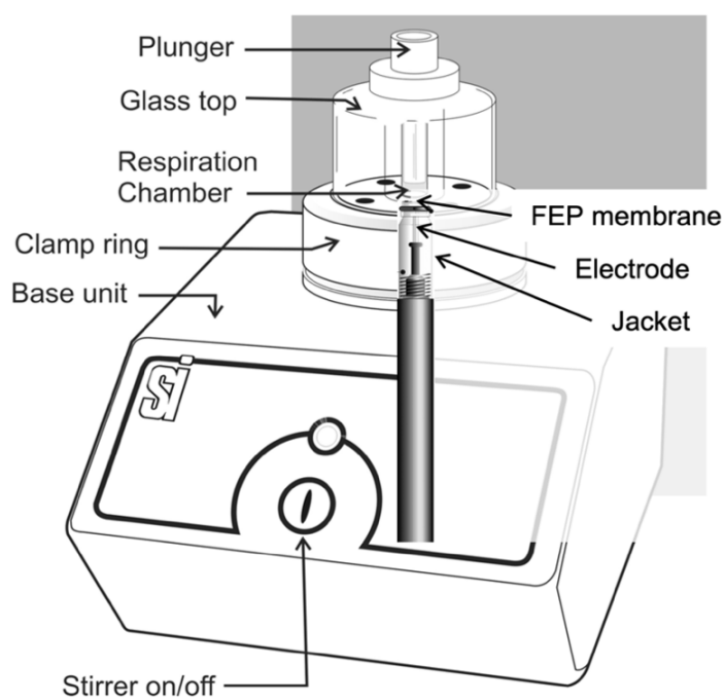

**Figure S2.** Strathkelvin Mitocell and oxygen ( $O_2$ ) electrode, according to Strathkelvin Instruments Limited [58,59]. The Mitocell consists of a base unit, which controls the magnetic stirrer and holds the  $O_2$  electrode, and the glass top which forms the respiration chamber and holds a plunger on top. Base unit and glass top are connected through the clamp ring. The electrode swims in a buffered potassium chloride (KCl) solution and is covered by a jacket. The electrode is separated from the respiration chamber by the fluorethylenpropylen (FEP) membrane, which is highly but selectively permeable for  $O_2$ . Mitochondrial  $O_2$  consumption over time is therefore measurable and the mitochondrial viability determinable.

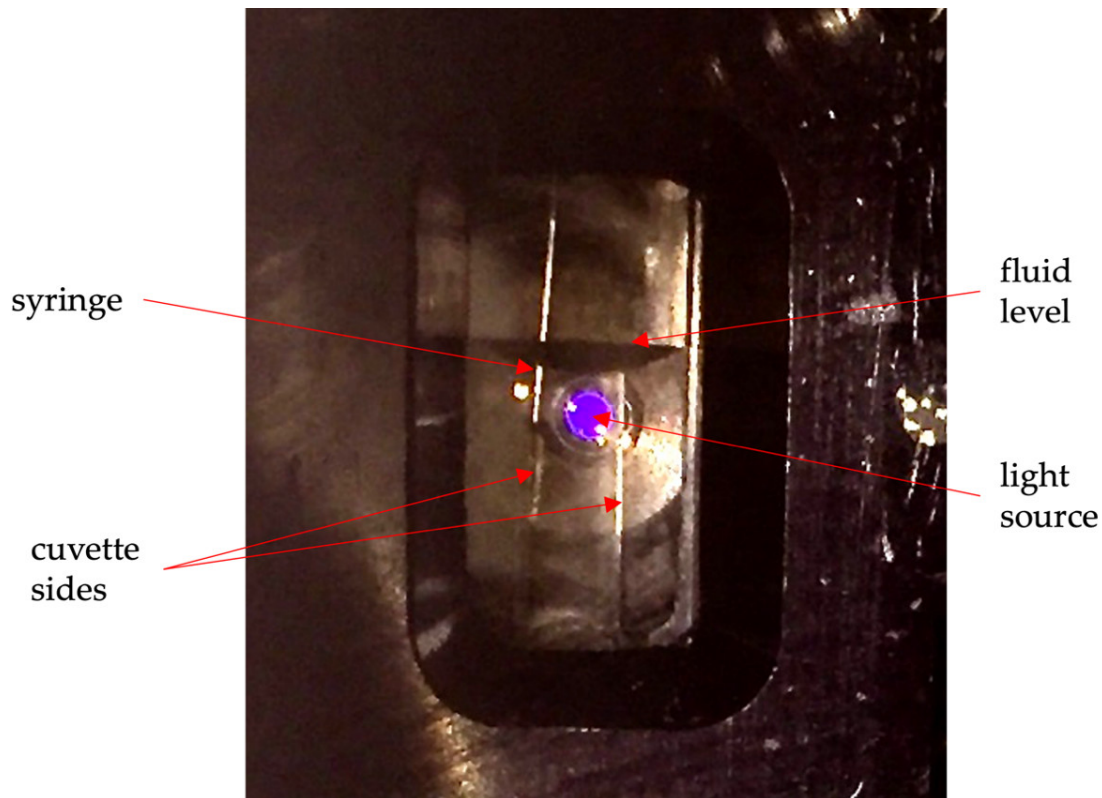

**Figure S3.** Calcium retention capacity (CRC) assay setup. The needle infusing the calcium chloride ( $CaCl_2$ ) had to be inserted deep enough into the cuvette so that the  $CaCl_2$  would not remain on top of the fluid level but instead be well mixed with the fluid in the cuvette. However, the needle was not allowed to cross the light path; therefore, the needle was inserted at a slight angle to rest at the side of the cuvette.
